# Supplementary material for: Silver Nanoparticles Embedded on Reduced Graphene Oxide@Copper Oxide Nanocomposite for High Performance Supercapacitor Applications
Source: MDPI journal article supplement (doi:10.3390/ma14175032), 2021-09-03
Supplement: s1 [file s1]

## Article

# Silver Nanoparticles Embedded on Reduced Graphene Oxide@Copper Oxide Nanocomposite for High Performance Supercapacitor Applications

Akhalakur Rahman Ansari<sup>1,2</sup>, Sajid Ali Ansari<sup>3</sup>, Nazish Parveen<sup>4</sup>, Mohammad Omaish Ansari<sup>2</sup> and Zurina Osman<sup>1,5\*</sup>

<sup>1</sup> Department of Physics, Faculty of Science, Universiti Malaya, 50603, Kuala Lumpur, Malaysia; akhalakur-kau@gmail.com

<sup>2</sup> Center of Nanotechnology, King Abdulaziz University, Jeddah, 21589, Saudi Arabia; omishchem@gmail.com

<sup>3</sup> Department of Physics, College of Science, King Faisal University, P.O. Box, 400, Hofuf, Al-Ahsa, 31982, Arabia; sansari@kfu.edu.sa

<sup>4</sup> Department of Chemistry, College of Science, King Faisal University, P.O. Box, 380, Hofuf, Al-Ahsa, 31982, Saudi Arabia; nislam@kfu.edu.sa

<sup>5</sup> Centre for Ionics Universiti Malaya, Universiti Malaya, 50603, Kuala Lumpur, Malaysia; zurina-osman@um.edu.my

\* Correspondence: zurinaosman@um.edu.my; Tel.: +603-79674206/4288

**Citation:** Ansari, A.R.; Ansari, S.A.; Parveen, N.; Ansari, M.O.; Osman, Z. Electrochemical properties of Ag nanoparticles embedded on a composite of reduced graphene oxide and CuO nanosheets. *Materials* **2021**, *14*, 5032. <https://doi.org/10.3390/ma14175032>

Received: 27 July 2021

Accepted: 30 August 2021

Published: 3 September 2021

**Publisher's Note:** MDPI stays neutral with regard to jurisdictional claims in published maps and institutional affiliations.

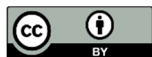

**Copyright:** © 2021 by the authors. Submitted for possible open access publication under the terms and conditions of the Creative Commons Attribution (CC BY) license (<http://creativecommons.org/licenses/by/4.0/>).

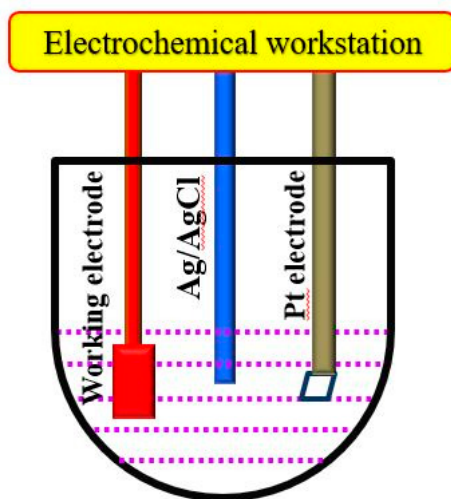

Figure S1. Schematic diagram of the electrochemical cell.

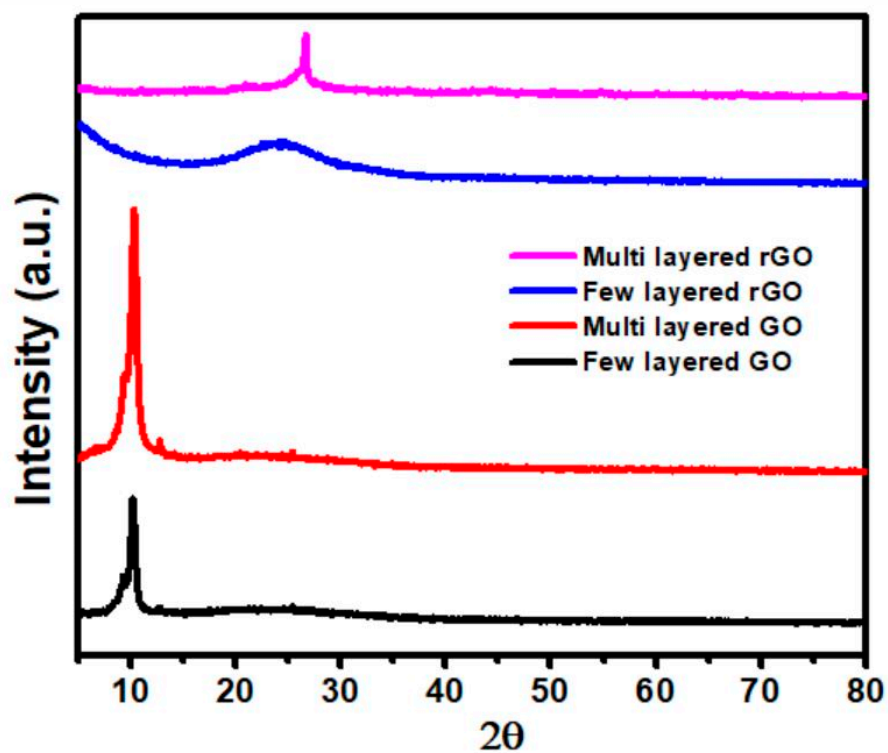

Figure S2. XRD pattern of few layered and multi layered GO and rGO.
